# Supplementary material
Source: MDPI journal article supplement (https://www.mdpi.com/2073-4395/13/8/2169)
Supplement: s1 [file s1]

## List of Supplementary figures

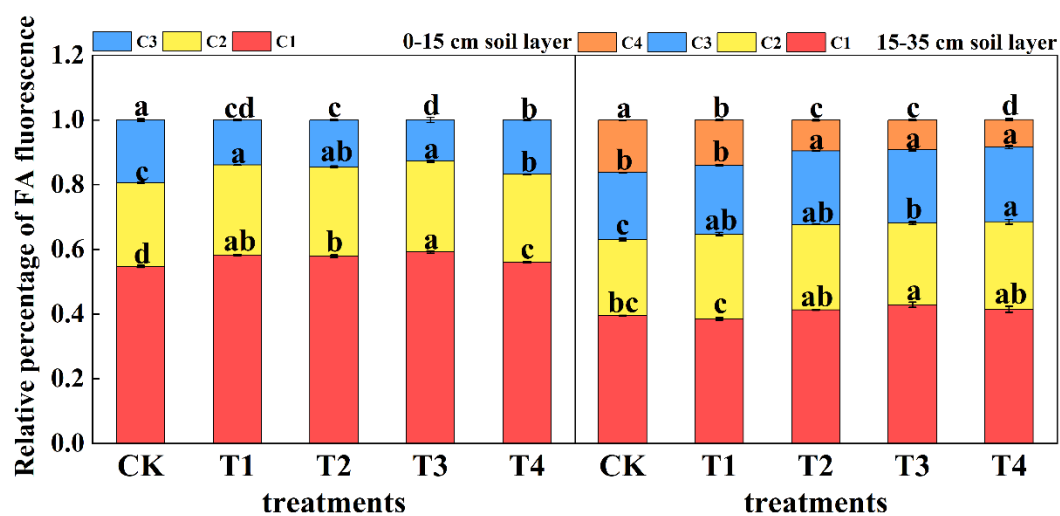

**Supplementary Figure S1.** Relative percentage of HA fluorescence components under different organic materials and their incorporation depths. Different letters indicate significant differences between samples ( $p < 0.05$ ). Values are mean  $\pm$  errors ( $n=4$ ).

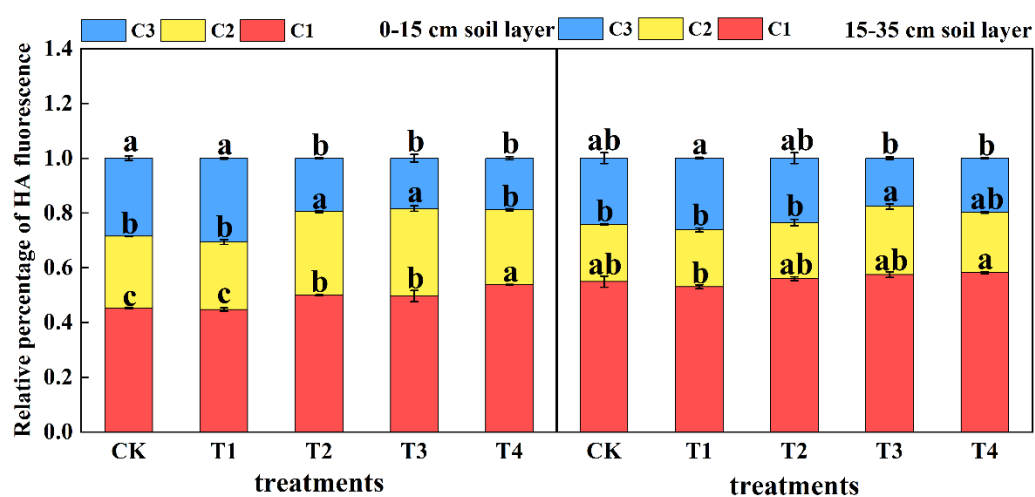

**Supplementary Figure S2.** Relative percentage of HA fluorescence components under different organic materials and their incorporation depths. Different letters indicate significant differences between samples ( $p < 0.05$ ). Values are mean  $\pm$  errors ( $n=4$ ).
